# Supplementary material
Source: publisher figshare collection journal article supplement (https://asha.figshare.com/ndownloader/files/31104010)
Supplement: Supplementary file 1 [file 31104010]

**Supplemental Material S1.** Cognate and false cognate items.

| <b>Cognates (same spelling)</b> | <b>Cognates (similar spelling)</b> | <b>False cognates</b> |
|---------------------------------|------------------------------------|-----------------------|
| fruit                           | papier/paper                       | chair/flesh           |
| cage                            | calendrier/calendar                | laid/ugly             |
| photo                           | dictionnaire/dictionary            | cent/hundred          |
| dragon                          | lettre/letter                      | pie/magpie            |
| dessert                         | guitare/guitar                     | crayon/pencil         |
| machine                         | carotte/carrot                     | pain/bread            |
| animal                          | moteur/motor                       | four/oven             |
| rose                            | tigre/tiger                        | cave/cellar           |
| face                            | parc/park                          | coin/corner           |
| date                            | docteur/doctor                     | sale/dirty            |

*Note.* For similar spelled cognates, the French word is displayed before the English word. For false cognates, the French word is displayed before the English translation.
